# Supplementary material for: PNA microprobe for label-free detection of expanded trinucleotide repeats
Source: Royal Society of Chemistry journal article supplement (doi:10.1039/d2ra00230b), 2022-01-01
Supplement: d2ra00230b1.pdf [file d2ra00230b1.pdf]

## Supplementary Information

### PNA Microprobe for Label-Free Detection of Expanded Trinucleotide Repeats

Narges Asefifeyzabadi,<sup>1</sup> Grace Durocher,<sup>1</sup> Kizito-Tshitoko Tshilenge,<sup>2</sup> Tanimul Alam,<sup>2</sup> Lisa M. Ellerby,<sup>2</sup> Mohtashim H. Shamsi<sup>1\*</sup>

**Table S1.** Single-stranded and double-stranded repeat sequences.

| Repeat type | Sequence                                                                   | #Repeats |
|-------------|----------------------------------------------------------------------------|----------|
| PNA-CTG-6   | HS-C <sub>6</sub> H <sub>12</sub> -CTG CTG CTG CTG CTG CTG                 | 6        |
| ssCAG-6     | 5'-CAG GAG CAG CAG CAG CAG -3'                                             | 6        |
| ssCAG-10    | 5'-CAG GAG CAG CAG CAG CAG CAG CAG CAG CAG -3'                             | 10       |
| ssCAG-15    | 5'-CAG CAG GAG CAG -3'             | 15       |
| ssCAG-20    | 5'-CAG CAG GAG CAG -3' | 20       |

**Extraction of Total RNA from Neural Stem Cells (NSCs).** For RNA extraction of prepatterned activin A treated human NSCs, total RNA was isolated according to the manufacturer's instructions using the ISOLATE II RNA Mini Kit (Bioline, BIO-52072), and eluted in 50 µl of RNase-free water and store at -80°C. The quantity and quality of RNA were assessed by measuring the optical density (OD) at 260 nm and 280 nm using a NanoDrop® ND-1000 Spectrophotometer (Thermo Fisher, MA, USA). The RNA quality of the sample was measured by monitoring the absorbance at A260/280 and A260/230 ratios. The extraction of CAG containing total RNA has been previously reported.<sup>1-3</sup> The HD+ RNA had 72CAG/19CAG repeats, i.e. there is one allele with 72CAG and the other one with 19CAG. While the control sample (HD-) was generated from a genetic correction of HD72 by decreasing the CAG length to a

normal repeat of 21CAG. Therefore, the control sample (HD-) had 21CAG/19CAG repeats which leads to a normal phenotype. The extracted RNA was stored at -80 °C. For sample preparation, the RNA was thawed in cool environment and then diluted to working solutions of 10 ng·μL<sup>-1</sup> and 1 ng·μL<sup>-1</sup> in the working buffer of 100 μM Tris containing 20 mM MgCl<sub>2</sub> and 200 mM NaCl (pH = 8.5).

**HD CAG PCR.** The HD- (21CAG) and HD+ (72CAG) repeats were confirmed by performing PCR in the NSC cells. The HD- and HD+ NSC cells were purified with DNeasy Blood and Tissue Kit (Cat. No. 69504). The HD PCR mix is composed of 10 ng·μL<sup>-1</sup> of sample DNA (1 μL), GoTaq Green Master Mix (10 μL), DMSO (0.5 μL), 10 μM CAG-1 Forward primer 1μL, 10 μM HU3R Reverse Primer 1ul, Nuclease free water 6.5 μL (20 μL total). CAG-1 (ATGAAGGCCTTCGAGTCCCTCAAGTCCTTC) and HU3R (GGCGGCTGAGGAAGCTGAGGA). The PCR program used the following parameters: 96 °C, 10 min-> 95 °C, 30 sec|65 °C, 30 sec|72 °C, 1 min 30 sec (35 cycles) -> 72°C, 10 min -> 16 °C, infinite. 2% Agarose gel (2 g PCR agar in 100 mL 1XTAE buffer+ 1 μl Gelred) was used for electrophoresis and 10 μl nuclease free water was added to 10 μl PCR mix and loaded for gel run for 20-25min, 100V with a 100 bp PCR marker. The image was taken using Bio-Rad imager with Gelred protocol.

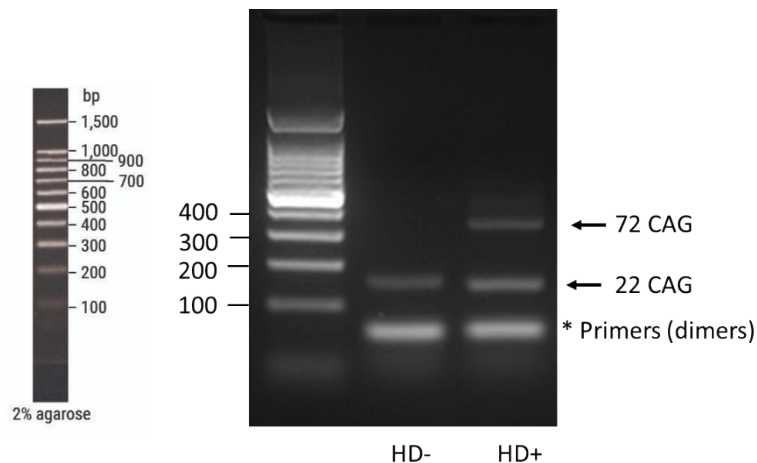

**Figure S1.** PCR of the CAG region of HD- (21CAG) and HD+ (72CAG). The expected product of 146 base pair was obtained for the HD- (21CAG). The expected products of around ~150 basepair and ~300 basepair were found for the HD+ (72CAG) DNA sample. The size of the molecular weight marker is in base pair for the x-axis.

**Table S2.** EIS extracted parameters of Figure 1. The average values with standard error of modified Randle's equivalent circuit elements. The errors were calculated for  $N \geq 4$  separate measurements.

| Sensor Layers | Solution Resistance  | Constant Phase Equivalent |      | Charge Transfer Resistance | Warburg Impedance                | Relative Error for R <sub>ct</sub> |
|---------------|----------------------|---------------------------|------|----------------------------|----------------------------------|------------------------------------|
|               | R <sub>s</sub><br>kΩ | CPE<br>μF                 | n    | R <sub>ct</sub><br>kΩ      | W<br>kΩ                          | %RSD                               |
| Bare gold     | 0.05 (0.004)         | 5.5 (1.6)                 | 0.90 | 1.2 (0.3)                  | 0.008 (0.01) × 10 <sup>8</sup>   | 25.0                               |
| PNA           | 0.05 (0.002)         | 0.22 (0.03)               | 0.88 | 5.6 (0.7)                  | 0.003 (0.004) × 10 <sup>12</sup> | 12.5                               |
| MCH           | 0.05 (0.01)          | 0.23 (0.18)               | 0.80 | 17.9 (3.6)                 | 0.002 (0.002) × 10 <sup>12</sup> | 20.1                               |
| PNA-MCH       | 0.05 (0.001)         | 0.20 (0.05)               | 0.89 | 27.8 (0.5)                 | 0.005 (0.006) × 10 <sup>9</sup>  | 1.7                                |

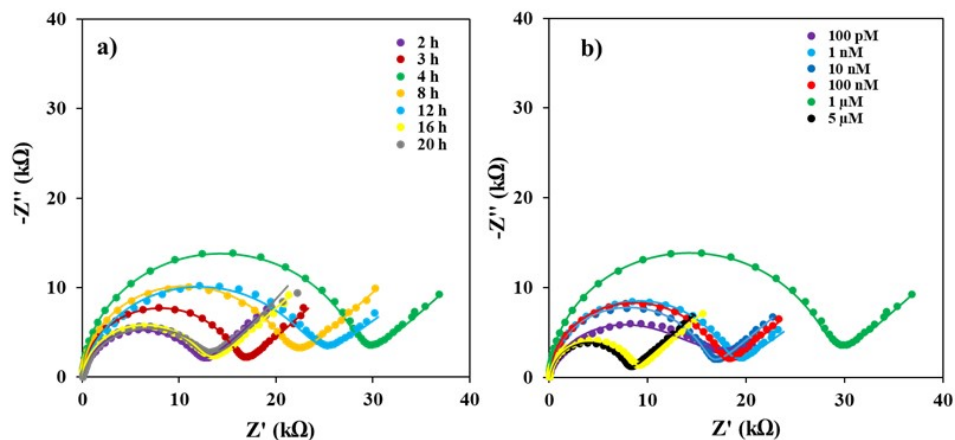

**Figure S2. a)** Nyquist plot of PNA probe (CTG-6) obtained at various incubation time. **b)** Nyquist plot of PNA probe (CTG-6) obtained at various concentration of the probe.

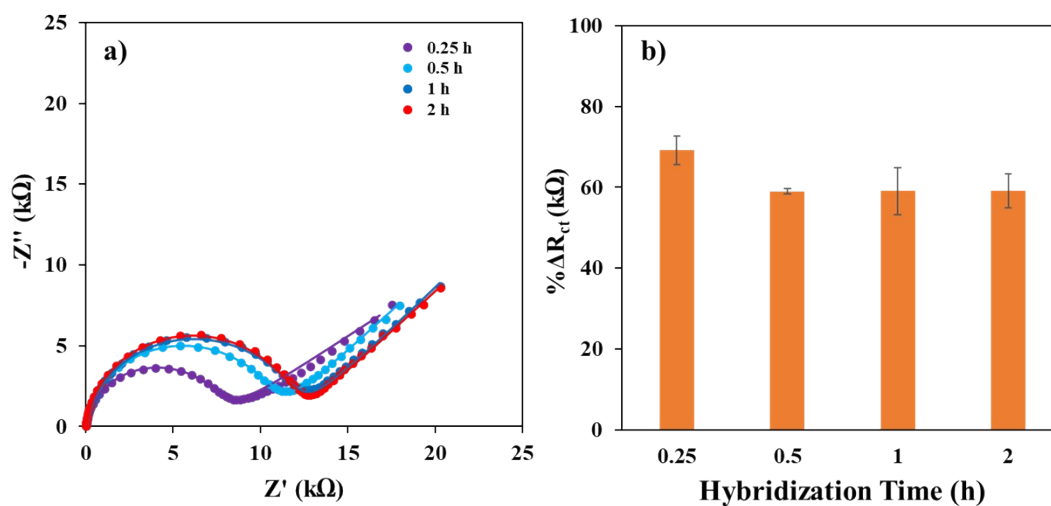

**Figure S3.** a) Nyquist plots of time of hybridization with the target (CAG-6). b) Percent change in  $R_{ct}$  after hybridization of 10 pM CAG-6 target. Error bar represents the standard deviation for  $N \geq 4$ .

| <b>Table S3.</b> T-test to confirm significant difference between the absolute $R_{ct}$ response of probe and the HD+ RNA sample |                        |                                |
|----------------------------------------------------------------------------------------------------------------------------------|------------------------|--------------------------------|
|                                                                                                                                  | PNA                    | HD+                            |
| #                                                                                                                                | $R_{ct}$ ( $k\Omega$ ) | $R_{ct}$ ( $k\Omega$ )         |
| 1                                                                                                                                | 27.3                   | 23.3                           |
| 2                                                                                                                                | 27.7                   | 23.3                           |
| 3                                                                                                                                | 28.2                   | 23.9                           |
| 4                                                                                                                                | 30.5                   | 25.3                           |
| Average                                                                                                                          | 28.4                   | 24.0                           |
| Standard Deviation                                                                                                               | 1.4                    | 0.9                            |
| Variance                                                                                                                         | 2.0                    | 0.9                            |
| p-value, F-Test                                                                                                                  | 0.511                  | > 0.05, Equal variance         |
| p-value, one tail T-Test                                                                                                         | 0.00099                | < 0.05, Significant difference |

1. J. Voisin, F. Farina, S. Naphade, M. Fontaine, K. T. Tshilenge, C. Galicia Aguirre, A. Lopez-Ramirez, J. Dancourt, A. Ginisty, S. Sasidharan Nair, K. Lakshika Madushani, N. Zhang, F. X. Lejeune, M. Verny, J. Campisi, L. M. Ellerby and C. Neri, *Aging Cell*, 2020, **19**, e13226.
2. K. L. Ring, M. C. An, N. Zhang, R. N. O'Brien, E. M. Ramos, F. Gao, R. Atwood, B. J. Bailus, S. Melov, S. D. Mooney, G. Coppola and L. M. Ellerby, *Stem Cell Reports*, 2015, **5**, 1023-1038.
3. M. C. An, N. Zhang, G. Scott, D. Montoro, T. Wittkop, S. Mooney, S. Melov and L. M. Ellerby, *Cell Stem Cell*, 2012, **11**, 253-263.
